# Supplementary material for: Dehydrodiisoeugenol Inhibits Colorectal Cancer Growth by Endoplasmic Reticulum Stress Induced Autophagic Pathways
Source: Preprints.org preprint supplement (doi:10.20944/preprints202012.0032.v1), 2020-12-01
Supplement: Supplementary file 1 [file supplementary]

Epigenetic molecular mechanism, targets and screening of anticancer drugs in  
gastrointestinal cancer (National key R & D projects)

重庆市第九人民医院伦理申请审查表

Ethical Application Review Form of the Ninth People's Hospital of Chongqing

——涉及人体生物医学研究项目（药物及器械临床试验、新技术应用等）的申请

--Applications involved in human biomedical research projects (Including clinical trials of drugs and devices, application of new technologies, etc.)

|                                                                                                                                                    |                                                                                                                                   |                                                                            |                         |
|----------------------------------------------------------------------------------------------------------------------------------------------------|-----------------------------------------------------------------------------------------------------------------------------------|----------------------------------------------------------------------------|-------------------------|
| 序号 (由委员会统一填写)<br>NO.                                                                                                                               | 2019 (伦审)<br>016 号<br>2019016-Project supported Institution                                                                       | 项目依托单位<br>西南大学医学研究院<br>Medical Research Institute,<br>Southwest University | 起止时间<br>2019/01-2024/02 |
| 项目名称<br>Project name                                                                                                                               | 消化道肿瘤发生的表观遗传分子机制、靶点和抗癌小分子药物筛选 (国家重点研发计划重点专项课题)                                                                                    |                                                                            |                         |
| 项目类别                                                                                                                                               | A. 新药物临床试验    B. 新器械临床试验    C. 新技术应用 <input checked="" type="checkbox"/> D. 人体标本收集    E. 其他 (请注明):    D.Human specimen collection |                                                                            |                         |
| 申请人 (项目负责人) 简要信息                                                                                                                                   |                                                                                                                                   |                                                                            |                         |
| 姓 名                                                                                                                                                | 潘光照<br>Guangzhao Pan                                                                                                              | 性别                                                                         | 男                       |
| 学历                                                                                                                                                 | 博士                                                                                                                                | 科室                                                                         |                         |
| 办公电话<br>移动电话                                                                                                                                       | 18983708534                                                                                                                       | 传 真<br>电子邮箱                                                                | m18983708534_2@163.com  |
| 通信地址                                                                                                                                               | 重庆北碚西南大学蚕学宫六楼                                                                                                                     | 邮政编码                                                                       | 400716                  |
| 目前主要研究方向                                                                                                                                           | 肿瘤生物学与医学转化                                                                                                                        |                                                                            |                         |
| 联系人简要信息                                                                                                                                            |                                                                                                                                   |                                                                            |                         |
| 姓 名                                                                                                                                                | 崔红娟<br>Hongjuan Cui                                                                                                               | 性别                                                                         | 女                       |
| 学历                                                                                                                                                 | 博士                                                                                                                                | 科室                                                                         |                         |
| 办公电话<br>移动电话                                                                                                                                       | 023-68251713                                                                                                                      | 传 真<br>电子邮箱                                                                | hcui@swu.edu.cn         |
| 通信地址                                                                                                                                               | 重庆北碚西南大学蚕学宫六楼                                                                                                                     | 邮政编码                                                                       | 400716                  |
| 申请人 (项目负责人) 承诺:<br>以上所填内容均属实, 如获批准, 我将严格按照提供的方案进行研究, 并遵守重庆市第九人民医院医学伦理委员会的相关规定。<br>申请人 (项目负责人) 签字: 潘光照    日期: 2019.01.01                            |                                                                                                                                   |                                                                            |                         |
| 伦理委员会审批意见:<br>伦理委员会已审查本研究项目, 研究设计和方法合理, 伦理符合要求, 研究者有足够的经验、设备、技术人员保障开展研究。因此同意开展此项研究。<br>重庆市第九人民医院伦理委员会 (盖章)<br>主任委员 (签章字): 2019.1.2    日期: 2019.1.2 |                                                                                                                                   |                                                                            |                         |
